# Supplementary material for: Carbon dots with aggregation induced emission enhancement for visual permittivity detection
Source: Royal Society of Chemistry journal article supplement (doi:10.1039/c5cc08635c), 2015-12-09
Supplement: c5cc08635c1.pdf [file c5cc08635c1.pdf]

## Electronic Supplementary Information (ESI)

*for*

# Carbon Dots with Aggregation Induced Emission Enhancement for Visual Permittivity Detection

Ze Xi Liu <sup>a</sup>, Zhu Lian Wu <sup>b</sup>, Ming Xuan Gao <sup>b</sup>, Hui Liu <sup>a,\*</sup>, Cheng Zhi Huang <sup>a,b,\*</sup>

---

<sup>a</sup> Key Laboratory of Luminescent and Real-Time Analytical Chemistry (Southwest University), Ministry of Education, College of Pharmaceutical Science, Southwest University, Chongqing 400715, China. E-mail: [liuhui78@swu.edu.cn](mailto:liuhui78@swu.edu.cn), Tel: (+86) 23 68254659, Fax: (+86) 23 68367257

<sup>b</sup> Chongqing Key Laboratory of Biomedical Analysis (Southwest University), Chongqing Science & Technology Commission, College of Chemistry and Chemical Engineering, Southwest University, Chongqing 400715, China. E-mail: [chengzhi@swu.edu.cn](mailto:chengzhi@swu.edu.cn),

## Contents in ESI

### 1. Experimental Section

#### 1.1 Materials

#### 1.2 Synthesis of carbonaceous nanospheres

#### 1.3 Characterizations

#### 1.4 Quantum yield calculation

#### 1.5 Calculation of fluorescence lifetime

### 2. Results

#### 2.1 Figures

**Fig.S1** UV-vis absorption spectra and PL spectra of TA-CDs and TA.

**Fig.S2** PL spectra of TA in water/THF mixture solution.

**Fig.S3** XRD pattern of TA-CDs.

**Fig.S4** Raman Spectra of TA-CDs.

**Fig.S5** XPS spectra of CDs.

**Fig.S6** Fourier transformed infrared spectrum of the CDs.

**Fig.S7** Linear fitting for quantum yield calculation of CDs and Quinine sulfate.

**Fig.S8** Fluorescence lifetime intensity decay of CDs in aqueous solution.

**Fig.S9** PL intensity of TA-CDs in different ionic strengths

**Fig.S10** PL intensity of TA-CDs under continuous excitations.

**Fig.S11** PL spectra of TA-CDs in water, ethylenediamine, THF, toluene and benzene.

**Fig.S12** Aggregation features of TA-CDs measured with dynamic light scattering (DLS).

**Fig.S13** Fluorescence lifetime intensity decay of CDs in aqueous solution and 80% THF solution.

**Fig.S14** The fluorescence emission spectra of the TA-CDs in water solution and glycerol solution.

## *2.2 Tables*

**Table S1** Fluorescence lifetime of CDs in aqueous solution

**Table S2** Rate constants of CDs in aqueous solution and 80% THF solution.

**Table S3** Calculation of two items in the permittivity fitting curve.

## *2.3 Schemes*

**Scheme S1** State of surface groups before and after the addition of THF.

## **3. Notes and references**

## 1. Experimental Section

### 1.1 Materials

Tannic acid (99%) was purchased from Xiya Reagent (Chengdu, China). THF (99.0 wt%, MV=72.11) was purchased from Aladdin (USA). Cefotaxime sodium salt was purchased from Aladdin (USA). NaCl, KCl, ZnSO<sub>4</sub>, K<sub>2</sub>SO<sub>4</sub>, Pb(NO<sub>3</sub>)<sub>2</sub>, KNO<sub>3</sub> and other reagents were of analytical reagent grade. The solutions were prepared using Milli-Q purified water (18.2 MΩ).

### 1.2 Synthesis of carbonaceous nanospheres

First, 0.17 g tannic acid was added into 4 mL purified water and then dissolved sufficiently in ultrasonic condition. Next, the solution was transferred to a 25 mL teflon-lined stainless-steel autoclave and heated at 150 °C for 120 min. The color of the solution turned from light yellow to dark brown. After cooling the solution to room temperature, small molecules were detached through a dialysis membrane (1000 MWCO). Solid CDs were then concentrated by freezing at -80 °C and dried under vacuum for quantitative use. Characterizations of the TA-CDs were carried on by UV-Vis spectrophotometer, fluorescence spectrophotometer, scanning transmission electron microscopy and fourier transform infrared spectroscopy. To eliminate the effect of remaining TA, UV-vis absorption spectra and photoluminescence spectra of TA and TA-CDs were measured (Fig.S1). The emission intensity of TA-CDs was about 20 times of TA with the same concentration. What is more, PL spectra of TA in glycerol/water mixture solutions with glycerol ratio of 0, 20%, 40%, 60%, 80% were measured. With the increase of glycerol ratio, PL intensity of TA also enhanced, but until dispersed in 80% glycerol solution, PL intensity of TA was still quite weak. Thus, in subsequent use, such a weak PL emission of TA could be ignored.

### 1.3 Characterizations

Fluorescence spectroscopy was performed with an F-2500 fluorescence spectrophotometer (Hitachi, Tokyo, Japan), and UV-vis absorption spectroscopy was

performed with a UV-3600 spectrophotometer (Hitachi, Tokyo, Japan). Functional group analyses were carried out using a Fourier transform infrared spectrometer (FTIR-8400S, Toyota, Japan). The fluorescence life time was measured with FLTCSPC fluorescence spectrophotometer (Horiba Jobin Yvon Inc., France). The scanning electron microscope image was performed with a S4800 scanning transmission electron microscope (Hitachi, Tokyo, Japan).

#### 1.4 Quantum yield calculation

The fluorescence quantum yield ( $\phi$ ) of TA-CDs was calculated using the fluorescence intensity and absorbance values of quinine sulfate as reference. The TA-CDs was dissolved in ultrapure water ( $\eta = 1.33$ ) while quinine sulfate (literature  $\phi_R = 0.54$ ) was dissolved in 0.1 mol/L H<sub>2</sub>SO<sub>4</sub> (refractive index  $\eta = 1.33$ ). This method has been reported to measure the QY of carbon nanoparticles.<sup>1-3</sup>

Different concentrations of CDs and the quinine sulfate were made, all of which had absorbance less than 0.1 at the excitation wavelength of CDs. Then, According to Equation (1)

$$\phi = \phi_R \times \frac{m}{m_R} \times \frac{\eta^2}{\eta_R^2} \quad (1)$$

Where  $m$  is the slopes calculated in Fig.S1 and  $\eta$  is the refractive index of the solvent.

For this CDs solution,  $\frac{\eta}{\eta_R} = 1$ , wherein the subscript of  $R$  refers to the reference. The

QY of TA-CDs was calculated to be 7.16%.

According to Equation (1), the QY of CDs was calculated to be 42.65% in 80% THF ( $\eta_{80\%THF} = 1.390$ ) solution. Wherein  $\eta_{80\%THF}$  was calculated by equation

$\eta_{80\%THF} = 20\% \eta_{water} + 80\% \eta_{THF}$ , wherein  $\eta_{THF} = 1.404$ .

#### 1.5 Calculation of fluorescence lifetime

Average fluorescence lifetime of CDs was calculated according to Equation (2)

$$\bar{\tau} = \frac{A_1\tau_1 + A_2\tau_2 + A_3\tau_3}{A_1 + A_2 + A_3} \quad (2)$$

Wherein  $A_i$  is the fractional contributions of time-resolved decay lifetime of  $\tau_i$ . The average fluorescence lifetime of CDs in aqueous solution and 80% THF solution was calculated to be 1.85 ns and 1.21 ns.

## 2. Results

### 2.1 Figures

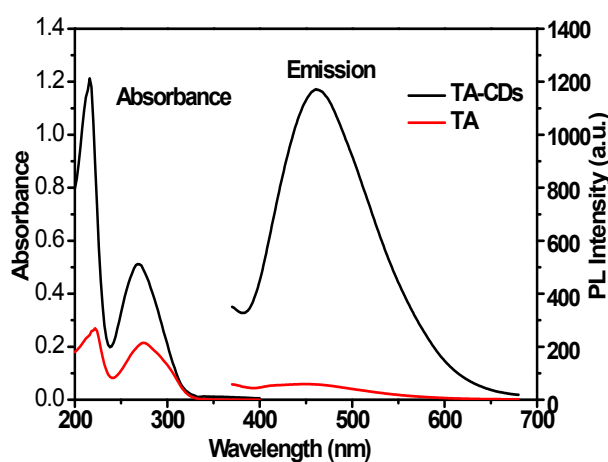

**Fig.S1** UV-vis absorption spectra and PL spectra of TA-CDs and TA. 0.05 mg/ml TA-CDs and TA were prepared to acquire PL spectra and the PL spectra were measured with excitation wavelength of 350 nm. The UV-vis absorption spectra were normalized.

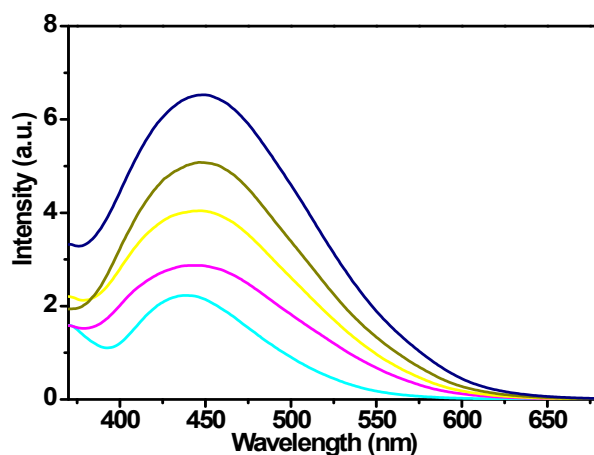

**Fig.S2** PL spectra of TA in glycerol and water mixture solutions with glycerol ratio of 0, 20%, 40%, 60%, 80%. TA was prepared to 2  $\mu\text{g/ml}$  in water/glycerol for PL measurement.

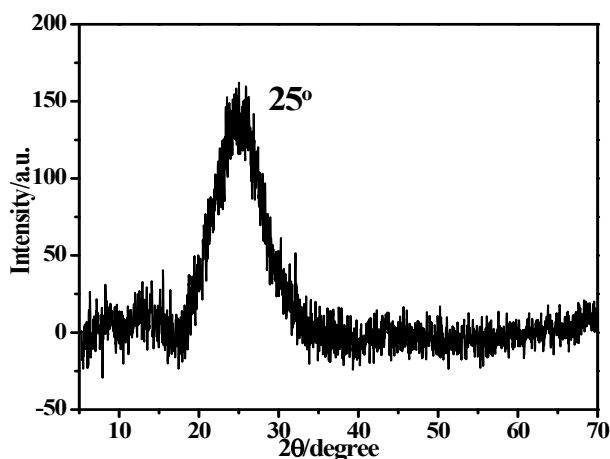

**Fig.S3 XRD pattern of TA-CDs.** The XRD pattern with a broad peak centered at  $25^\circ$  is attributed to the graphite lattice spacing and highly disordered carbon atoms, which is consistent with HRTEM image.<sup>4</sup>

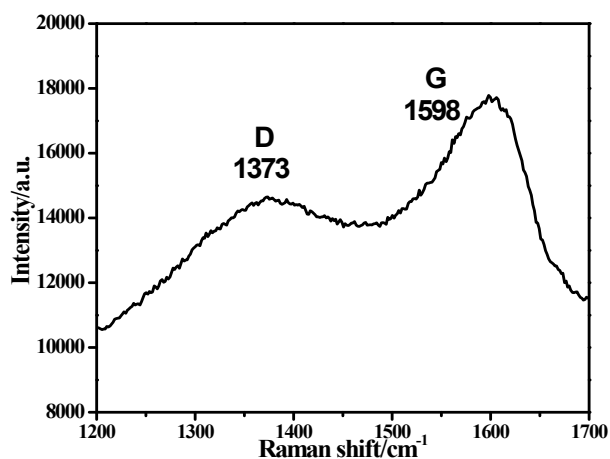

**Fig.S4 Raman Spectra of TA-CDs.** The Raman spectrum showed the G-band at  $1598\text{ cm}^{-1}$  and the D-band at  $1373\text{ cm}^{-1}$  which attribute to  $sp^2$  and  $sp^3$  carbons respectively. The relative intensity ( $I_D/I_G$ ) of the Raman peaks for the TA-CDs is around 0.82, indicating that they have a similar structure to graphite.<sup>5</sup>

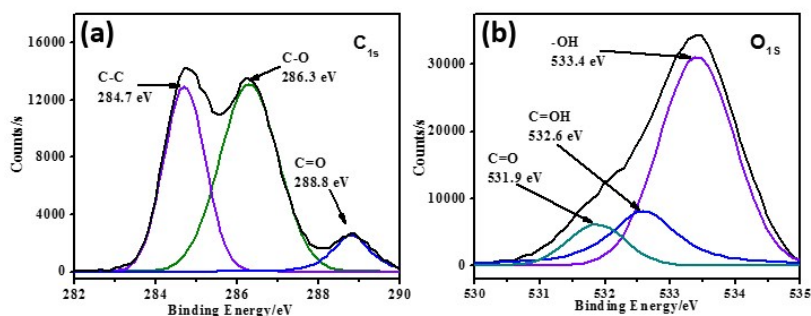

**Fig.S5 XPS spectra of CDs.** (a)  $C_{1s}$  spectra, (b)  $O_{1s}$  spectra of CDs. The  $C_{1s}$  spectrum shows

three peaks at 284.7, 286.3 and 288.8, which are attributed to C=C, C-O and C=O, respectively.<sup>6,7</sup> While the O1s spectrum exhibits three peaks at 531.9, 532.6 and 533.4 eV, which are attributed to O=C, C-OH and -OH groups, respectively.<sup>8-10</sup>

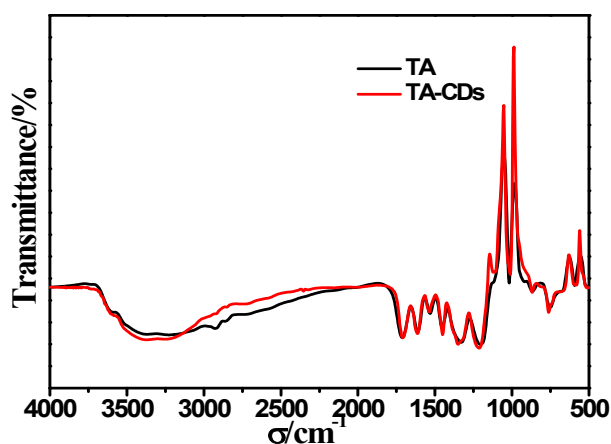

**Fig.S6 Fourier transformed infrared spectrum of the CDs.** The FTIR spectrum exhibited characteristic absorption bands of O-H, C=C, O-H and C-O stretching at about 3300  $\text{cm}^{-1}$ , 1612  $\text{cm}^{-1}$ , 1535  $\text{cm}^{-1}$ , 1450  $\text{cm}^{-1}$ , 1350  $\text{cm}^{-1}$  and 1211  $\text{cm}^{-1}$ . Usually, the stretching vibration peaks after 1000  $\text{cm}^{-1}$  are indicated for aromatic rings. The FTIR results indicated that there are aromatic rings and phenolic hydroxyl groups.

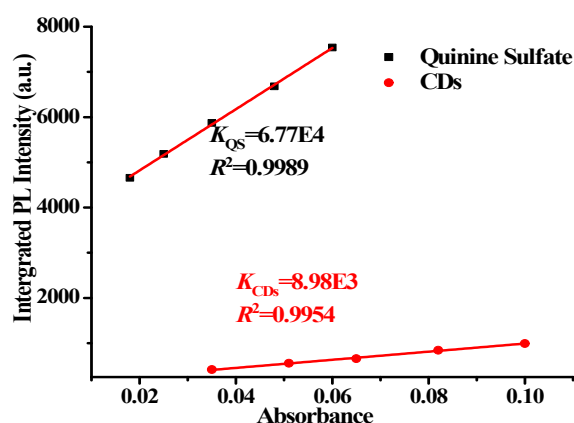

**Fig.S7 Linear fitting for quantum yield calculation of CDs and Quinine sulfate.** TA-CDs was dissolved in ultrapure water while quinine sulfate was dissolved in 0.1 mol/L  $\text{H}_2\text{SO}_4$ . All the TA-CDs and quinine sulfate solutions had absorbance less than 0.1 at the excitation wavelength of 350 nm.

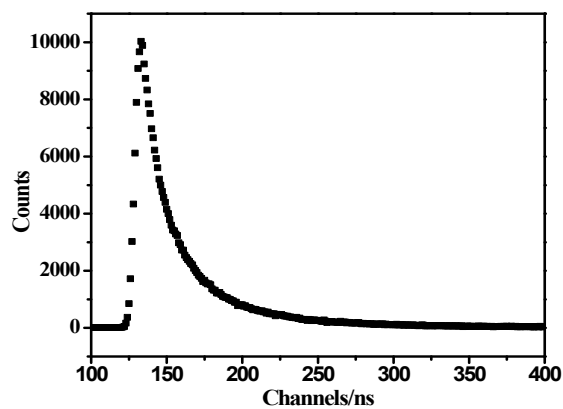

**Fig.S8** Fluorescence lifetime intensity decay of CDs in aqueous solution (excitation at 350 nm, emission at 455 nm). According to equation 2, fluorescence lifetime of TA-CDs was calculated to be 1.85 ns.

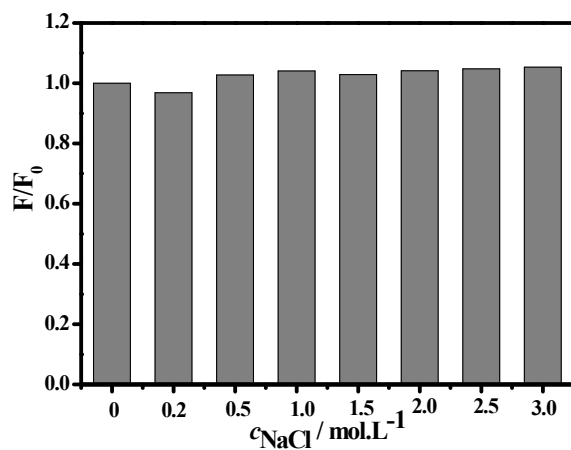

**Fig.S9** PL intensity of TA-CDs measured at 350 nm in different ionic strengths. All NaCl concentrations were final concentrations after CDs' addition.

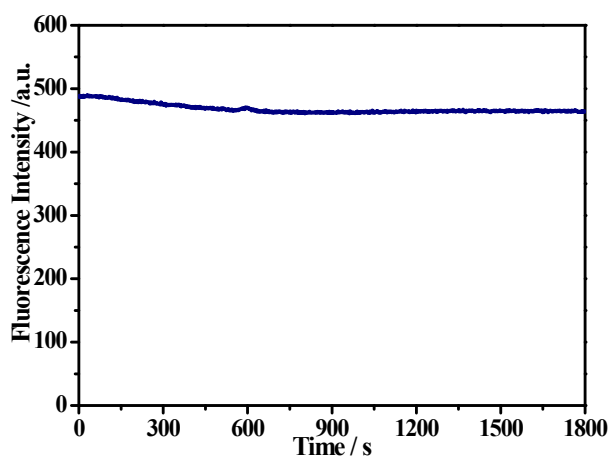

**Fig.S10** Fluorescence Intensity for the as-prepared TA-CDs under continuous excitations.



The excitation wavelength was 350nm and emission wavelength was 455 nm. After exposed under continuous excitations, fluorescence intensity of TA-CDs did not show an obvious decrease.

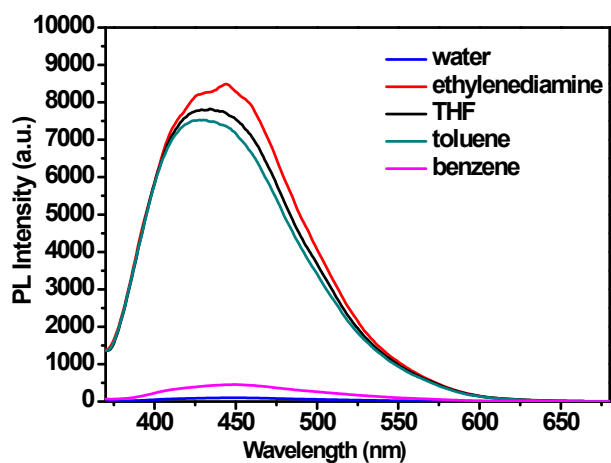

**Fig.S11** PL spectra of TA-CDs in water, ethylenediamine, THF, toluene and benzene. The permittivity of ethylenediamine, toluene and benzene was smaller than THF. The PL intensity of TA-CDs in ethylenediamine and toluene did not show a notable difference, but PL intensity of TA-CDs in benzene was only about 5 times of that in water, which had such a decrease comparing with that in THF.

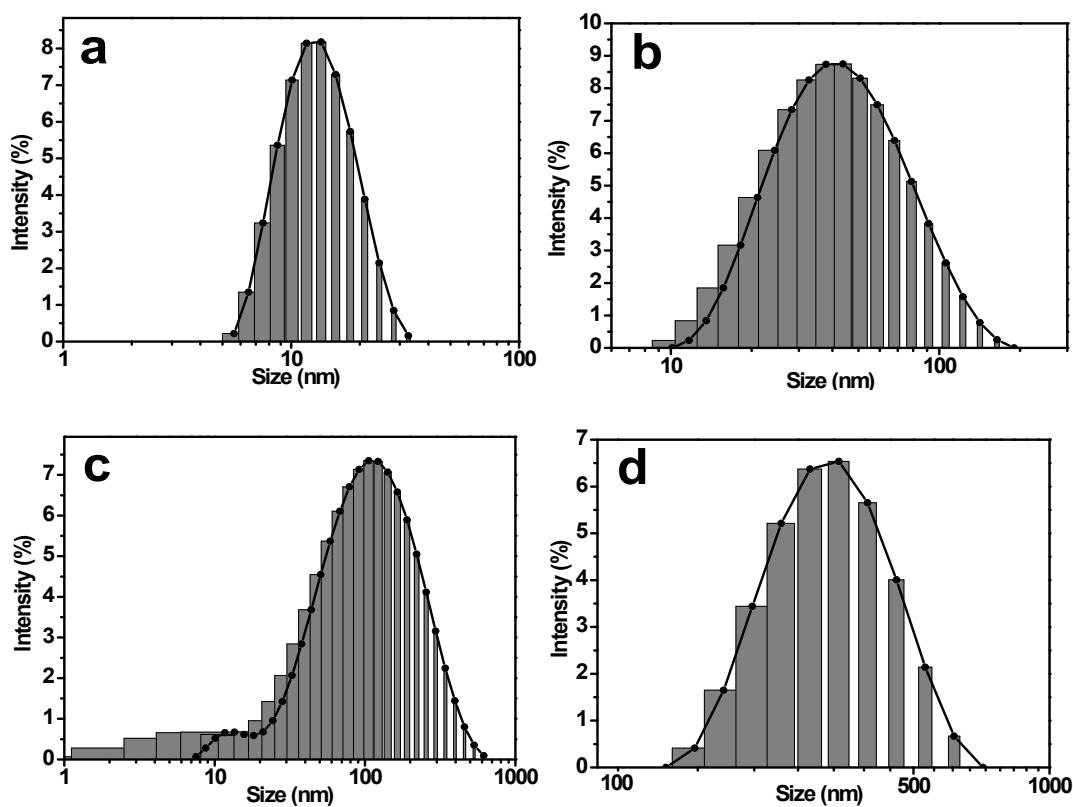

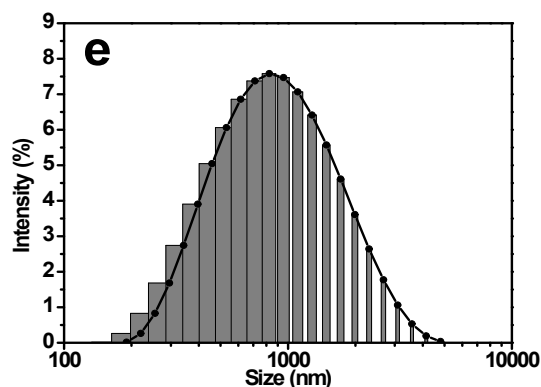

**Fig.S12** Aggregation features of TA-CDs in the presence of THF. a-e represent for diameters of TA-CDs in the aqueous medium of 0, 10%, 20%, 30% and 50% THF through dynamic light scattering (DLS), respectively.

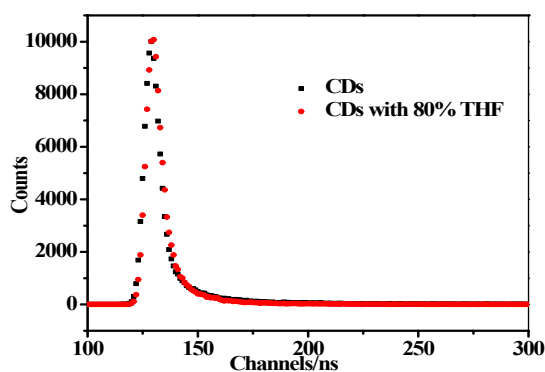

**Fig.S13** Fluorescence lifetime intensity decay of CDs in aqueous solution and 80% THF solution (excitation at 350 nm, emission at 455 nm). Fluorescence lifetime of CDs in 80% THF solution decreased from 1.85 ns to 1.21 ns comparing with CDs in aqueous solution.

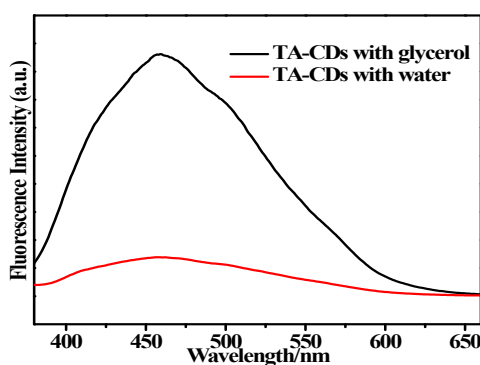

**Fig.S14** The fluorescence emission spectra of the TA-CDs in aqueous solution and 50% glycerol solution. Fluorescence emission spectra achieved under excitation wavelength of 350 nm. Fluorescence intensity of TA-CDs in 50% glycerol was about 10 times of which in aqueous solution.

## 2.2 Schemes

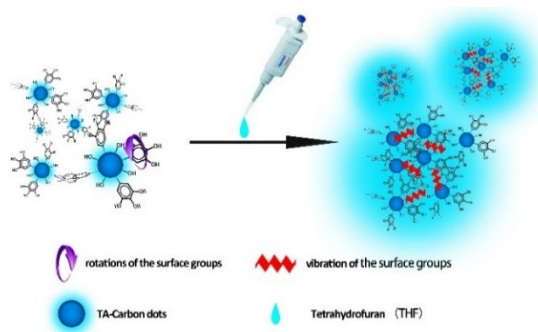

**Scheme S1** State of surface groups before and after the addition of THF.

## 2.3 Tables

**Table S1** Fluorescence lifetime of CDs in aqueous solution

|          | $\tau_i/\text{ns}$ | $A_i/\%$ |
|----------|--------------------|----------|
| $\tau_1$ | 0.56               | 70.27    |
| $\tau_2$ | 2.59               | 22.37    |
| $\tau_3$ | 11.96              | 7.36     |

The fluorescence lifetime was fitted using a three-exponential decay function to yield the lifetime of TA-CDs. Wherein  $A_i$  is the fractional contributions of time-resolved decay lifetime of  $\tau_i$ .

**Table S2** Calculation of two items in the permittivity fitting curve.

| $\varepsilon$            | $9.53 \times 10^5 (e^{-\frac{\varepsilon}{4.82 \times 10^6}} - 1)$ | $5.52 \times 10^3 e^{-\frac{\varepsilon}{1.68}}$ |
|--------------------------|--------------------------------------------------------------------|--------------------------------------------------|
| 7.6                      | -1.503                                                             | 78.645                                           |
| 10.4                     | -2.056                                                             | 27.881                                           |
| 12.3                     | -2.432                                                             | 22.877                                           |
| 12.79<br>(turning point) | -2.529                                                             | 20.029                                           |
| 18.3                     | -3.618                                                             | 16.812                                           |
| 20.7                     | -4.093                                                             | 16.908                                           |
| 24.5                     | -4.844                                                             | 16.853                                           |
| 26.3                     | -5.200                                                             | 16.900                                           |
| 32.7                     | -6.465                                                             | 17.654                                           |

|      |         |        |
|------|---------|--------|
| 36.7 | -7.256  | 17.845 |
| 37.5 | -7.414  | 17.708 |
| 47.2 | -9.332  | 17.654 |
| 65   | -12.852 | 17.841 |
| 80   | -15.817 | 16.817 |

In the table, the first and the second term of the fitting curve (equation 1 in the main text) between permittivity ( $\epsilon$ ) and fluorescence intensity ratio ( $\frac{I}{I_0}$ ) was calculated.

**Table S3** Rate constants of CDs in aqueous solution and 80% THF solution.

|                            | In aqueous solution | In 80% THF solution |
|----------------------------|---------------------|---------------------|
| $\phi/\%$                  | 7.16                | 42.65               |
| $\tau/\text{ns}$           | 1.85                | 1.21                |
| $k_r/10^6\text{s}^{-1}$    | 38.7                | 352.5               |
| $k_{nr}/10^8\text{s}^{-1}$ | 5.02                | 4.74                |

Wherein,  $\phi$  and  $\tau$  represent for fluorescence quantum yield and fluorescence lifetime. According to equation 2 and 3 in the main text,  $k_r$  and  $k_{nr}$  represent for radiative rate and non-radiative rate, respectively.

### 3. Notes and references

1. J. G. Zhou, C. Booker, R. Y. Li, X. T. Zhou, T. K. Sham, X. L. Sun and Z. F. Ding, *J. Am. Chem. Soc.*, 2007, **129**, 744-745.
2. D. Y. Pan, J. C. Zhang, Z. Li, C. Wu, X. M. Yan and M. H. Wu, *Chem. Commun.*, 2010, **46**, 3681-3683.
3. L. X. Lin and S. W. Zhang, *Chem. Commun.*, 2012, **48**, 10177-10179.
4. S. N. Qu, X. Y. Wang, Q. P. Lu, X. Y. Liu and L. J. Wang, *Angew. Chem. Int. Ed.*, 2012, **51**, 12215-12218.
5. R. L. Liu, D. Q. Wu, S. H. Liu, K. Koynov, W. Knoll and Q. Li, *Angew. Chem. Int. Ed.*, 2009, **48**, 4598-4601.
6. S. Liu, J. Tian, L. Wang, Y. Luo, W. Lu and X. Sun, *Biosens. Bioelectron.*, 2011, **26**, 4491-4496.
7. Z. L. Wu, P. Zhang, M. X. Gao, C. F. Liu, W. Wang, F. Leng and C. Z. Huang, *J. Mater. Chem. B*, 2013, **1**, 2868-2873.
8. Z. L. Wu, M. X. Gao, T. T. Wang, X. Y. Wan, L. L. Zheng and C. Z. Huang, *Nanoscale*, 2014, **6**,

3868-3874.

9. T. I. T. Okpalugo, P. Papakonstantinou, H. Murphy, J. McLaughlin and N. M. D. Brown, *Carbon*, 2005, **43**, 153-161.
10. S. Fleutot, J. C. Dupin, G. Renaudin and H. Martinez, *Phys. Chem. Chem. Phys.*, 2011, **13**, 17564-17578.
